# Supplementary material for: Exciplex formation between pyrene and guanine in highly polar solventsElectronic supplementary information (ESI) available: fluorescence and fluorescence excitation spectra of PyG6. See http://www.rsc.org/suppdata/cc/b3/b316315f/
Source: Royal Society of Chemistry journal article supplement (doi:10.1039/b316315f), 2004-01-01
Supplement: b316315f.doc [file b316315f.doc]

**Exciplex Formation Between Pyrene and Guanine in Highly Polar Solvent**

**Takahiro Kawai, Masashi Ikegami and Tatsuo Arai***

**Department of Chemistry, University of Tsukuba**

**Fig. S-1.** Concentration dependence of the fluorescence spectrum of **PyG6** in DMF on excitation at 328 nm under argon atmosphere. a) The spectrum was normalized at the maximum of the monomer emission. b) Enlarged figure in the range from 400 nm to 600 nm.

**Fig. S-2.**  Fluorescence and fluorescence excitation spectra of **PyG6** in DMF under argon atmosphere.

**Fig. S-3.**  Fluorescence and fluorescence excitation spectra of **PyG6** in DMF:acetonitrile = 1:9 under argon atmosphere.

**Fig. S-4.**  Fluorescence and fluorescence excitation spectra of **PyG6** in DMF:methanol = 1:9 under argon atmosphere.

**Fig. S-5.**  Fluorescence and fluorescence excitation spectra of **PyG6** in DMF:dichloromethane = 1:9 under argon atmosphere.

**Fig. S-6.**  Fluorescence and fluorescence excitation spectra of **PyG6** in DMF:chloroform = 1:9 under argon atmosphere.
